# Supplementary material for: New Immunohistochemical Markers for Pleural Mesothelioma Subtyping
Source: Preprints.org preprint supplement (doi:10.20944/preprints202308.0382.v1), 2023-08-04
Supplement: Supplementary file 1 [file supplementary]

Archive with 4 entries (4 files):
- Figure_S1.tif
- Figure_S2.tif
- Supplement Figure Legends.pdf
- Supplement Table S1.docx
