# Supplementary material for: New Immunohistochemical Markers for Pleural Mesothelioma Subtyping
Source: Preprints.org preprint supplement (doi:10.20944/preprints202308.0382.v1), 2023-08-04
Supplement: Supplementary file 1 [file supplementary › Supplement Figure Legends.pdf]

**Supplement Figure S1:** Correlation between immunohistochemical results and gene expression levels.

**Supplement Figure S2:** Immunohistochemical expression in the two components of biphasic subtype and correlation with the percentage of epithelioid component.
