# Supplementary material for: New Immunohistochemical Markers for Pleural Mesothelioma Subtyping
Source: Preprints.org preprint supplement (doi:10.20944/preprints202308.0382.v1), 2023-08-04
Supplement: Supplementary file 1 [file supplementary › Supplement Table S1.docx]

Table S1. High immunohistochemical expression (> cut-off) among subtypes: Training and Validation cohort.

| Training cohort | | | | | |
| --- | --- | --- | --- | --- | --- |
|  | **Mesothelin** | **Claudin-15** | **CFB** | **PAI1** | **PAK4** |
| **Training**  **cohort (n=73)** | 37 (50.7%) | 26 (35.6%) | 25 (32.2%) | 46 (63%) | 54 (74%) |
| **ES (n=31)** | 31 (100%) | 21 (67.7%) | 18 (58.1%) | 11 (35.5%) | 18 (58.1%) |
| **BS (n=25)** | 6 (24%) | 3 (12%) | 7 (28%) | 20 (80%) | 23 (92%) |
| **SS (n=17)** | 0 (0%) | 2 (11.8%) | 0 (0%) | 15 (88.2%) | 13 (76.5%) |
| Validation cohort | | | | | |
|  | **Mesothelin** | **Claudin-15** | **CFB** | **PAI1** | **PAK4** |
| **Validation**  **cohort (n=30)** | 14 (46.7%) | 11 (36.7%) | 9 (30%) | 20 (66.7%) | 23 (76.7%) |
| **ES (n=11)** | 10 (90.9%) | 8 (72.7%) | 7 (63.6%) | 8 (72.7%) | 7 (63.6%) |
| **BS (n=11)** | 4 (36.4%) | 3 (27.3%) | 2 (18.2%) | 6 (54.5%) | 10 (90.9%) |
| **SS (n=8)** | 0 (0%) | 0 (0%) | 0 (0%) | 6 (75%) | 6 (75%) |

ES: epithelioid subtype; BS: biphasic subtype; SS: sarcomatoid subtype; CFB: Complement factor B; PAI1: Plasminogen activator inhibitor 1, PAK4: p21-activated kinase 4.
