# Supplementary figures and images for: New Immunohistochemical Markers for Pleural Mesothelioma Subtyping
Source: Preprints.org preprint supplement (doi:10.20944/preprints202308.0382.v1), 2023-08-04

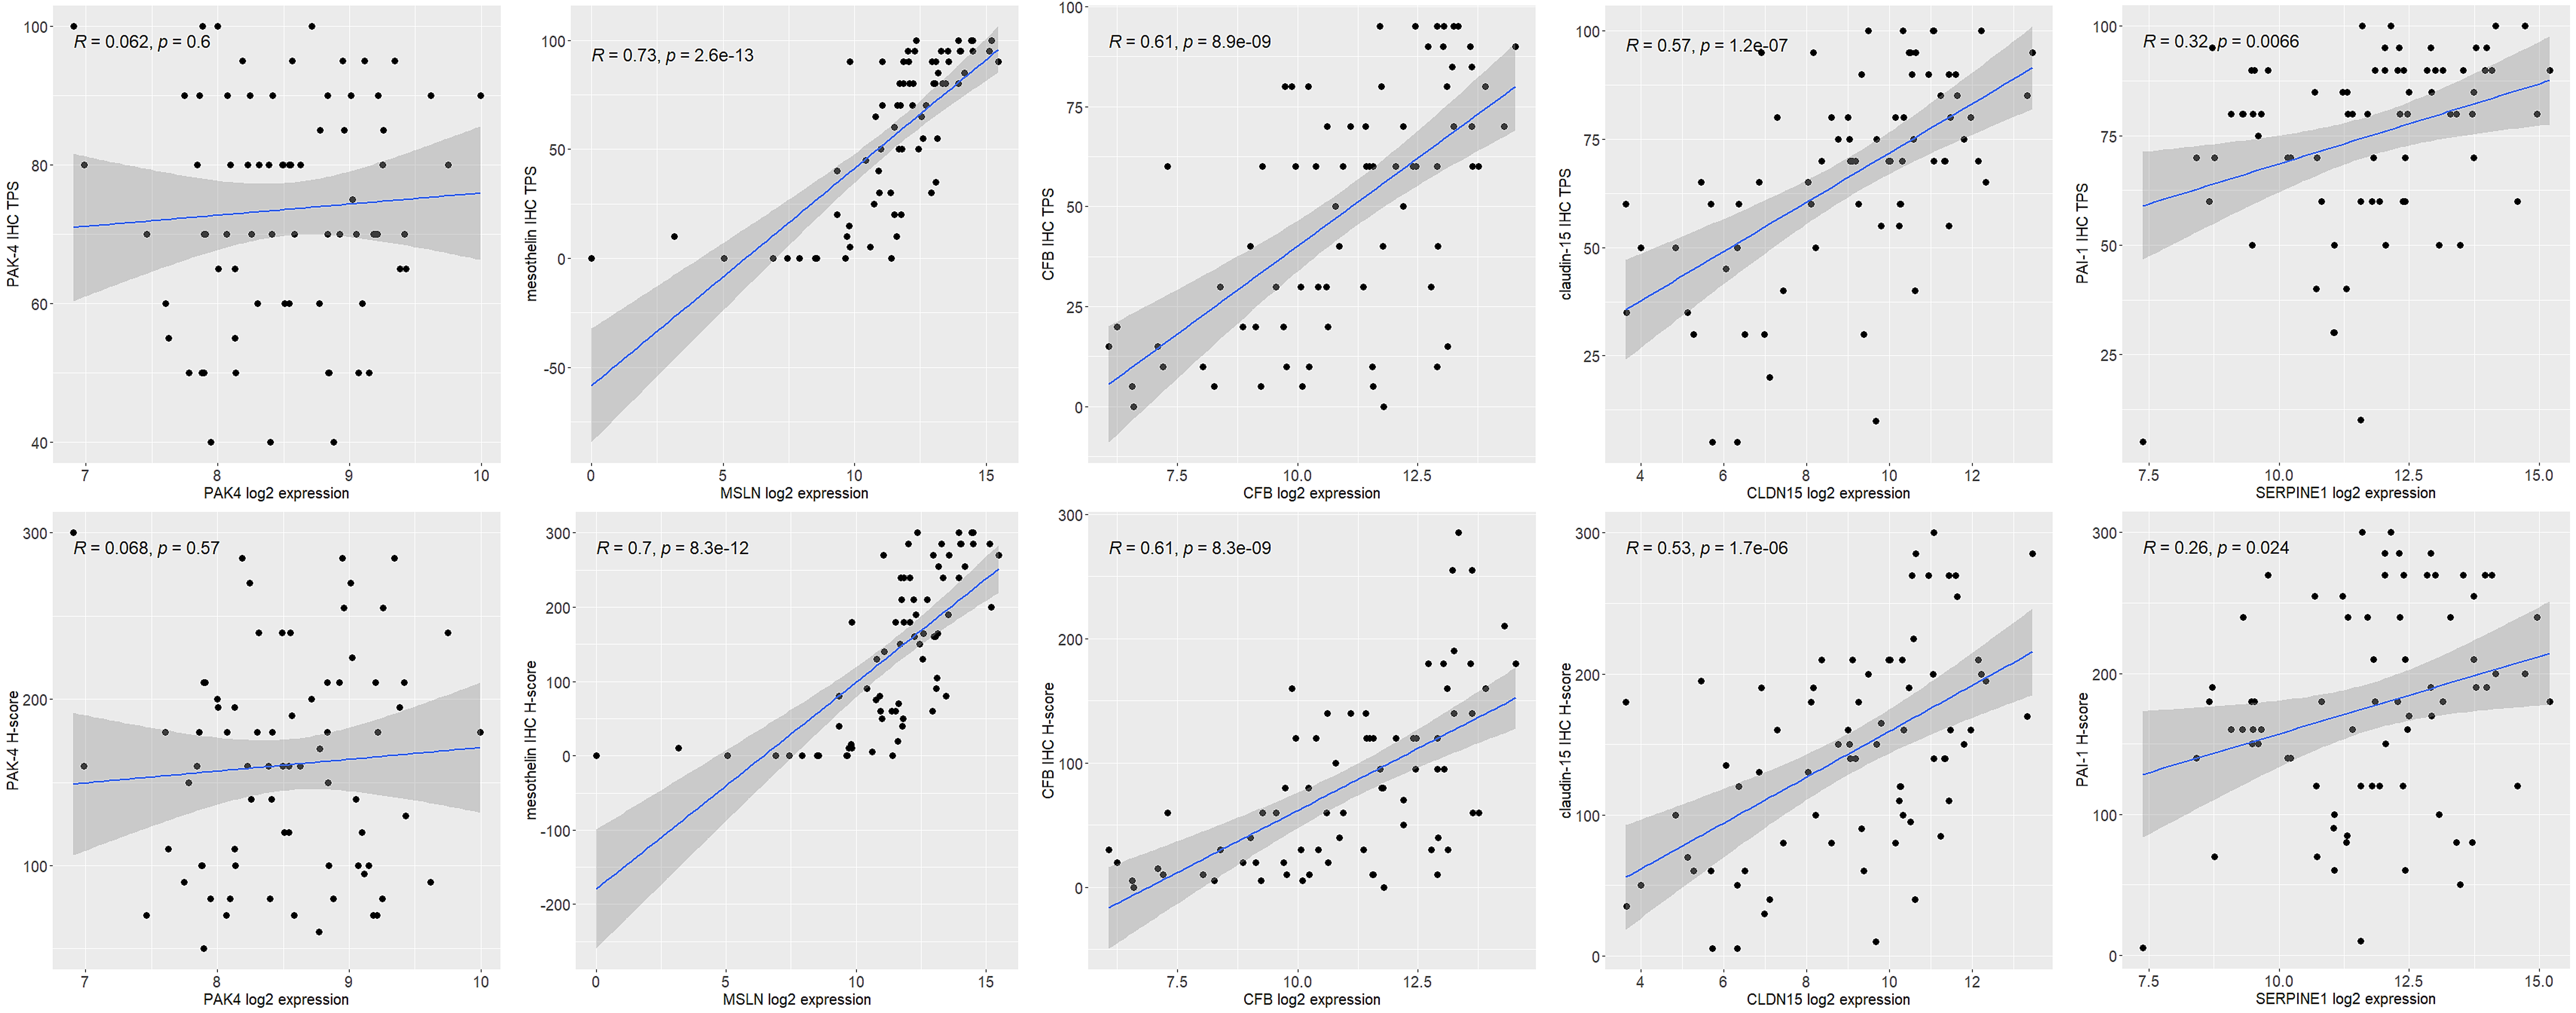

Supplement: Supplementary file 1 [file supplementary › Figure_S1.tif]

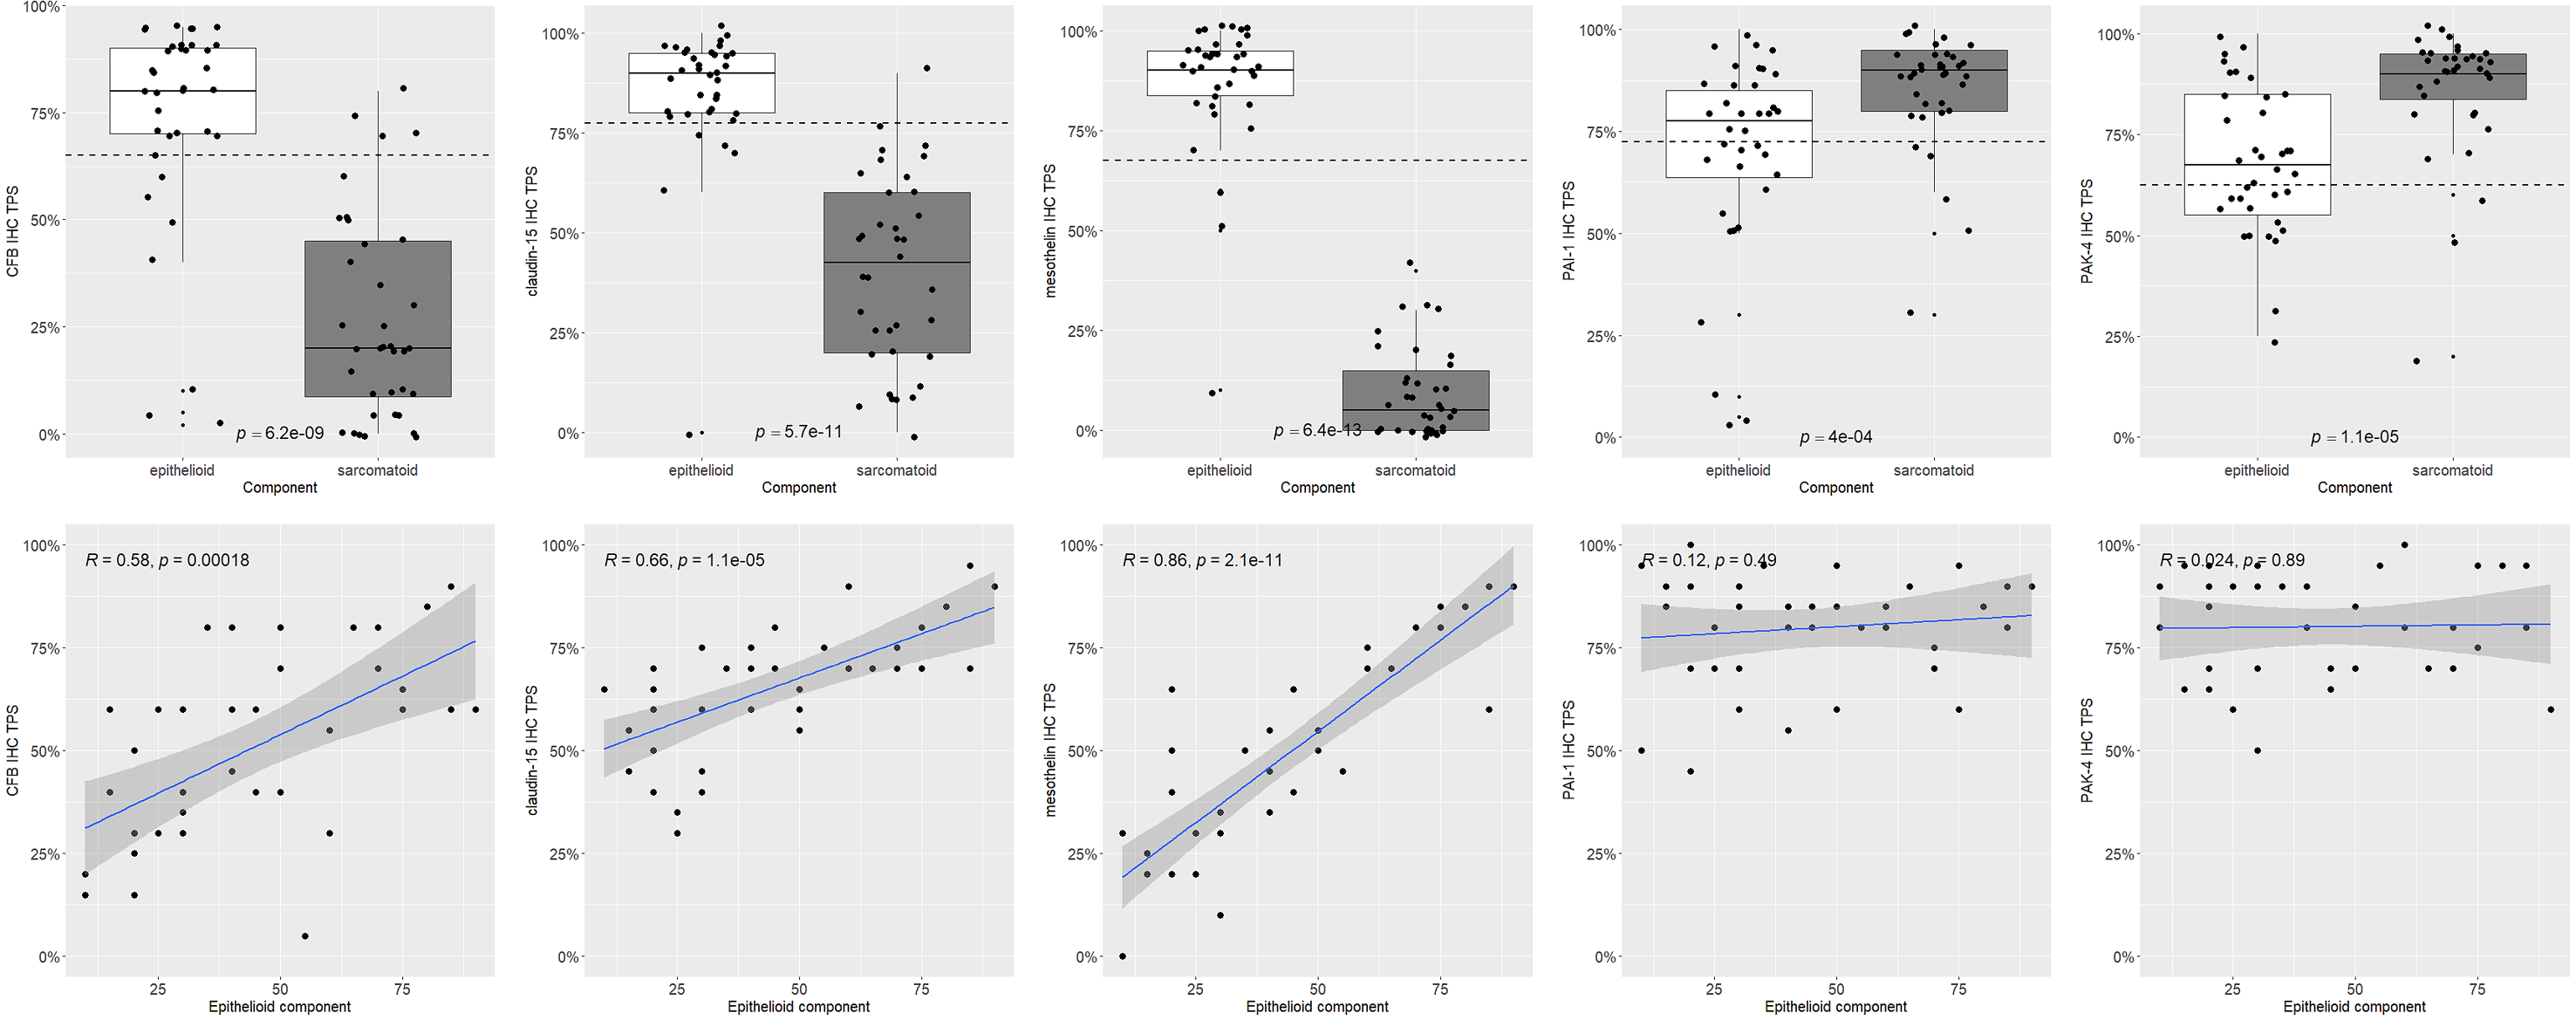

Supplement: Supplementary file 1 [file supplementary › Figure_S2.tif]
